# Supplementary material for: Efficacy and safety of retatrutide for overweight/obesity or type 2 diabetes: a systematic review and meta-analysis
Source: Research Square preprint supplement (doi:10.21203/rs.3.rs-7103001/v1), 2025-08-14
Supplement: Supplementary file 1 [file 1cf82bfbce45b8770de08fce.pdf]

| Study                 | NCT ID      | Completion Date | Population        | Treatment duration | Participants,n | Interventions(mg) | Age,years  | Male, n (%) | BMI, kg/m <sup>2</sup> | T2D,n (%) |
|-----------------------|-------------|-----------------|-------------------|--------------------|----------------|-------------------|------------|-------------|------------------------|-----------|
| Jastreboff AM,2023    | NCT04881760 | 2022.11         | Overweigh/Obesity | 48weeks            | 338            | 1-12;qw           | 48.2(12.7) | 175 (51.8%) | 37.3(5.7)              | 0         |
| Shweta Urva,2022      | NCT04143802 | 2020.12         | T2D               | 12weeks            | 67             | 0.5-12;qw         | 58.4 (7.4) | 35 (49%)    | 32.1(5.1)              | 72(100)   |
| Julio Rosenstock,2023 | NCT04867785 | 2022.10         | T2D               | 36weeks            | 235            | 0.5-12;qw         | 56.2 (9.7) | 125(44%)    | 35.0(6.3)              | 281(100)  |

**Table 1. Baseline characteristics of participants in the included retatrutide trials. Age and BMI were reported in Mean±SD.**
